# Supplementary material
Source: publisher figshare collection journal article supplement (https://acs.figshare.com/ndownloader/files/4184731)
Supplement: Supplementary file 1 [file 4184731]

data_sal1006a 
_audit_creation_date        10-06-24
_audit_creation_method CRYSTALS_ver_12.87
_audit_update_record                   
;
2010-06-25 - Report on C3 H6 As4 I6
             by Anthony C. Willis
             for   Di Lu and S. Bruce Wild and Geoff Salem

2010-06-25 - passes checkcif tests with minor warnings

;

_oxford_structure_analysis_title  '6241138 sal1006'
_chemical_name_systematic         ?
_chemical_melting_point           ?

#end of refcif 
_cell_length_a                    9.3774(2)
_cell_length_b                    19.0852(3)
_cell_length_c                    10.0191(2)
_cell_angle_alpha                 90
_cell_angle_beta                  94.8205(13)
_cell_angle_gamma                 90
_cell_volume                      1786.77(6)
 
_symmetry_cell_setting            'Monoclinic' 
_symmetry_space_group_name_H-M    'P 1 21/c 1 ' 
_symmetry_space_group_name_Hall   ? 
loop_
 _symmetry_equiv_pos_as_xyz
 'x,y,z'
 '-x,-y,-z'
 '-x,y+1/2,-z+1/2'
 'x,-y+1/2,z+1/2'

loop_
_atom_type_symbol
_atom_type_scat_dispersion_real
_atom_type_scat_dispersion_imag
_atom_type_scat_Cromer_Mann_a1
_atom_type_scat_Cromer_Mann_b1
_atom_type_scat_Cromer_Mann_a2
_atom_type_scat_Cromer_Mann_b2
_atom_type_scat_Cromer_Mann_a3
_atom_type_scat_Cromer_Mann_b3
_atom_type_scat_Cromer_Mann_a4
_atom_type_scat_Cromer_Mann_b4
_atom_type_scat_Cromer_Mann_c
_atom_type_scat_source  
 C       0.0033   0.0016   2.3100  20.8439   1.0200  10.2075   1.5886   0.5687
   0.8650  51.6512   0.2156 'International Tables Vol C 4.2.6.8 and 6.1.1.4'
 H       0.0000   0.0000   0.4930  10.5109   0.3229  26.1257   0.1402   3.1424
   0.0408  57.7998   0.0030 'International Tables Vol C 4.2.6.8 and 6.1.1.4'
 As      0.0499   2.0058  16.6723   2.6345   6.0701   0.2647   3.4313  12.9479
   4.2779  47.7972   2.5310 'International Tables Vol C 4.2.6.8 and 6.1.1.4'
 I      -0.4742   1.8119  20.1472   4.3470  18.9949   0.3814   7.5138  27.7660
   2.2735  66.8776   4.0712 'International Tables Vol C 4.2.6.8 and 6.1.1.4'
 
 
_cell_formula_units_Z                    4

# Given Formula = C6 H12 As8 I12 
# Dc =      8.20 Fooo =   1896.00 Mu =    355.05 M =   2206.39
# Found Formula = C3 H6 As4 I6 
# Dc =      4.10 FOOO =   1896.00 Mu =    177.52 M =   1103.20

_chemical_formula_sum             'C3 H6 As4 I6'
_chemical_formula_moiety          'C3 H6 As4 I6'
_chemical_compound_source                local
_chemical_formula_weight           1103.20
 
 
_cell_measurement_reflns_used        89976
_cell_measurement_theta_min              2.6
_cell_measurement_theta_max             27.5
_cell_measurement_temperature          200
 
_exptl_crystal_description        'lath' 
_exptl_crystal_colour             'yellow' 
_exptl_crystal_size_min           0.030 
_exptl_crystal_size_mid           0.110 
_exptl_crystal_size_max           0.220 
 
_exptl_crystal_density_diffrn     4.101 
_exptl_crystal_density_meas       ? 
_exptl_crystal_density_method     'not measured' 
# Non-dispersive F(000): 
_exptl_crystal_F_000              1896 
_exptl_absorpt_coefficient_mu     17.752 
 
# Sheldrick geometric approximatio 0.14 0.59 
# Absorption correction 

loop_
_exptl_crystal_face_index_h 
_exptl_crystal_face_index_k 
_exptl_crystal_face_index_l 
_exptl_crystal_face_perp_dist 
    1    0    0  0.020
   -1    0    0  0.010
    0    1    0  0.080
    0   -1    0  0.030
    0    0    1  0.110
    0    0   -1  0.110
    0    1   -1  0.096


_exptl_absorpt_correction_type 'integration' 
_exptl_absorpt_correction_T_min  0.166
_exptl_absorpt_correction_T_max  0.591
_exptl_absorpt_process_details
;
via Gaussian method (Coppens, 1970) implemented in maXus (2000)
;
#_diffrn_reflns_av_R_equivalents   0.048

# For a Kappa CCD, set Tmin to 1.0 and 
# Tmax to the ratio of max:min frame scales in scale_all.log 
_diffrn_measurement_device        'Nonius KappaCCD' 
_diffrn_measurement_device_type   'Area' 
_diffrn_radiation_monochromator   'graphite' 
_diffrn_radiation_type            'Mo K\a'
_diffrn_radiation_wavelength           0.71073
_diffrn_measurement_method ' \f and \w scans with CCD ' 
_diffrn_special_details
;
CCD data collecting conditions-
phi and omega scans of width 1.0 deg at rate 900 sec/frame,
crystal-detector distance 32mm,
multiple scan sets so over 90 percent of data collected with 4-fold  
redundancy or more.
;
 
# If a reference occurs more than once, delete the author 
# and date from subsequent references. 
_computing_data_collection        'COLLECT (Nonius, 2001).' 
_computing_cell_refinement        'DENZO/SCALEPACK (Otwinowski & Minor, 1997)' 
_computing_data_reduction         'DENZO/SCALEPACK (Otwinowski & Minor, 1997)' 
_computing_structure_solution     'SIR92 (Altomare et al., 1994)' 
_computing_structure_refinement   'CRYSTALS (Betteridge et al., 2003)' 
_computing_publication_material   'CRYSTALS (Betteridge et al., 2003)' 
_computing_molecular_graphics 
; 
ORTEP-II (Johnson 1976) in teXsan (MSC, 1992-1997)
; 
 
_diffrn_standards_interval_time   . 
_diffrn_standards_interval_count  . 
_diffrn_standards_number          0 
_diffrn_standards_decay_%         ? 
 
_diffrn_ambient_temperature        200
_diffrn_reflns_number             35577 
_reflns_number_total              4044 
_diffrn_reflns_av_R_equivalents   0.074 
# Number of reflections without Friedels Law is 0 
# Number of reflections with Friedels Law is 4044 
# Theoretical number of reflections is about 8130 
 
 
_diffrn_reflns_theta_min          2.953 
_diffrn_reflns_theta_max          27.403 
_diffrn_measured_fraction_theta_max 0.997 
 
_diffrn_reflns_theta_full         27.403 
_diffrn_measured_fraction_theta_full 0.997 
 
 
_diffrn_reflns_limit_h_min        -12 
_diffrn_reflns_limit_h_max        12 
_diffrn_reflns_limit_k_min        -24 
_diffrn_reflns_limit_k_max        24 
_diffrn_reflns_limit_l_min        -11 
_diffrn_reflns_limit_l_max        12 
_reflns_limit_h_min               -12 
_reflns_limit_h_max               12 
_reflns_limit_k_min               0 
_reflns_limit_k_max               24 
_reflns_limit_l_min               0 
_reflns_limit_l_max               12 
 
_oxford_diffrn_Wilson_B_factor    2.86 
_oxford_diffrn_Wilson_scale       35.76 
 
_atom_sites_solution_primary      direct #heavy,direct,difmap,geom
# _atom_sites_solution_secondary  difmap
_atom_sites_solution_hydrogens    geom
 
_refine_diff_density_min          -1.37 
_refine_diff_density_max          1.30 
 
 
# The current dictionary definitions do not cover the 
# situation where the reflections used for refinement were 
# selected by a user-defined sigma threshold 
 
 
# The values actually used during refinement 
_oxford_reflns_threshold_expression_ref     I>-10.0\s(I)
_refine_ls_number_reflns          4043 
_refine_ls_number_restraints      0 
_refine_ls_number_parameters      118 
_oxford_refine_ls_R_factor_ref    0.0376 
_refine_ls_wR_factor_ref          0.0831 
_refine_ls_goodness_of_fit_ref    0.9534 
_refine_ls_shift/su_max           0.0010049 
_refine_ls_shift/su_mean          0.00007 # 1.1758612 
 
 
# The values computed from all data 
_oxford_reflns_number_all         4043 
_refine_ls_R_factor_all           0.0376 
_refine_ls_wR_factor_all          0.0831 
 
# The values computed with a 2 sigma cutoff - a la SHELX 
_reflns_threshold_expression      I>2.0\s(I)
_reflns_number_gt                 3585 
_refine_ls_R_factor_gt            0.0318 
_refine_ls_wR_factor_gt           0.0780 
 
# choose from: rm (reference molecule of known chirality), 
# ad (anomolous dispersion - Flack), rmad (rm and ad), 
# syn (from synthesis), unk (unknown) or . (not applicable). 
_chemical_absolute_configuration  '.' 
 
 
_refine_ls_structure_factor_coef  Fsqd 
_refine_ls_matrix_type            full
_refine_ls_hydrogen_treatment     constr      # none, undef, noref, refall,
                                             # refxyz, refU, constr or mixed
_refine_ls_weighting_scheme       calc 
_refine_ls_weighting_details 
;
 Method, part 1, Chebychev polynomial, (Watkin, 1994, Prince, 1982) 
 [weight] = 1.0/[A~0~*T~0~(x)+A~1~*T~1~(x) ... +A~n-1~]*T~n-1~(x)] 
 where A~i~ are the Chebychev coefficients listed below and x= Fcalc/Fmax 
 Method = Robust Weighting (Prince, 1982) 
 W = [weight] * [1-(deltaF/6*sigmaF)^2^]^2^ 
 A~i~ are: 
 165. 278. 175. 75.0 17.6 
;


#                                                                               
# 1. SUBMISSION DETAILS                                                         
_publ_requested_journal               ' test '
_publ_requested_category              FM 
_publ_contact_author_name             ' Anthony C. Willis '

_publ_contact_author_address
;
Research School of Chemistry,
The Australian National University,
Canberra, A. C. T. 0200, Australia
;
_publ_contact_letter
;
    ENTER TEXT OF LETTER
;

_publ_requested_coeditor_name          ?
_publ_contact_author_phone            ' 61 2 6125 4109 '
_publ_contact_author_fax              ' 61 2 6125 0750 '
_publ_contact_author_email            ' willis@rsc.anu.edu.au '
                                                                                
#=============================================================================  
# 2. PROCESSING SUMMARY (IUCr Office Use Only)                                  
_journal_date_recd_electronic     ?                                             
_journal_date_to_coeditor         ?                                             
_journal_date_from_coeditor       ?                                             
_journal_date_accepted            ?                                             
_journal_date_printers_first      ?                                             
_journal_date_printers_final      ?                                             
_journal_date_proofs_out          ?                                             
_journal_date_proofs_in           ?                                             
_journal_coeditor_name            ?                                             
_journal_coeditor_code            ?                                             
_journal_coeditor_notes                                                         
;                                                                               
                                  ?                                             
;                                                                               
_journal_techeditor_code          ?                                             
_journal_techeditor_notes                                                       
;                                                                               
                                  ?                                             
;                                                                               
_journal_coden_ASTM               ?                                             
_journal_name_full                ?                                             
_journal_year                     ?                                             
_journal_volume                   ?                                             
_journal_issue                    ?                                             
_journal_page_first               ?                                             
_journal_page_last                ?                                             
_journal_suppl_publ_number        ?                                             
_journal_suppl_publ_pages         ?                                             
#=============================================================================  
# 3. TITLE AND AUTHOR LIST                                                      
_publ_section_title                                                             
;                                                                               
Crystal structure of  C~3~H~6~As~4~I~6~  ---  sal1006a
;                                                                               
# The loop structure below should contain the names and addresses of all        
# authors, in the required order of publication. Repeat as necessary.           
loop_
_publ_author_name
_publ_author_address
' Di Lu '
;
Research School of Chemistry,
The Australian National University,
Canberra, A. C. T. 0200, Australia
;
'  Geoff Salem '
;
Research School of Chemistry,
The Australian National University,
Canberra, A. C. T. 0200, Australia
;
'  Anthony C. Willis '
;
Research School of Chemistry,
The Australian National University,
Canberra, A. C. T. 0200, Australia
;
'  S. Bruce Wild '
;
Research School of Chemistry,
The Australian National University,
Canberra, A. C. T. 0200, Australia
;
#============================================================================== 
# 4. TEXT                                                                       
_publ_section_abstract  #Text of the abstract                                   
;                                                                               
The crystal structure of C~3~H~6~As~4~I~6~
 is reported.
;                                                                               
_publ_section_comment  #Text of the paper                                       
;                                                                               

The  crystallographic asymmetric unit consists of one molecule of 
C~3~H~6~As~4~I~6~.


;                                                                               
_publ_section_acknowledgements  # Acknowledgments                               
;                                                                               
?                                                                               
;                                                                               
_publ_section_figure_captions  #Captions to figures                             
;                                                                               
?                                                                               
;                                                                               
_refine_special_details
#_publ_section_exptl_refinement                                          
# see also _refine_ls_hydrogen for refinement keywords.                         
;                                                                               


H atoms were included at calculated positions
and ride on the atom to which they are attached.

Most of the largest peaks in a final difference electron density map
 are located near I and As atoms.
;                                                                               
_publ_section_exptl_prep                                                        
;                                                                               
    The compound was prepared by DL and 
recrystallised from dichloromethane.
The sample ID was DL06.

;                                                                               
 
#**************************************************************************** 
# Insert your own references if required - in alphabetical order 
_publ_section_references 
; 
Mackay, S., Gilmore, C. J.,Edwards, C., Stewart, N. & Shankland, K.
(2000). maXus  Computer Program for the Solution and Refinement of
Crystal Structures. Nonius, The Netherlands, MacScience, Japan & The
University of Glasgow.

Altomare, A., Cascarano, G., Giacovazzo, C., Guagliardi, A., Burla, M.C., 
Polidori, G. & Camalli, M. (1994) SIR92 - a program for automatic solution 
of crystal structures by direct methods. J. Appl. Cryst. (27), 435-435 
 
Betteridge, P.W., Carruthers, J.R., Cooper, R.I., 
Prout, K., Watkin, D.J. (2003). J. Appl. Cryst. 36, 1487. 
  
Nonius BV, COLLECT Software, 1997-2001) 
 
Otwinowski, Z. & Minor, W. (1996), Processing of X-ray 
Diffraction Data Collected in Oscillation Mode. Methods Enzymol. 
276, 1997, 307-326. Ed Carter, C.W. & Sweet, R.M., Academic Press. 
 
 Molecular Structure Corporation. (1992-1997). teXsan. 
Single Crystal Structure Analysis Software. Version 1.8.
MSC, 3200 Research Forest Drive, The Woodlands, TX 77381, USA.

Johnson, C.K. (1976)
ORTEP-II, A Fortran Thermal-Ellipsoid Plot Program, Report ORNL-5138, 
Oak Ridge National Laboratory, Oak Ridge, Tennessee, USA.

Coppens, P. (1970).  The Evaluation of Absorption and Extinction in
Single-Crystal Structure Analysis.  Crystallographic Computing.  F. R. Ahmed,
S. R. Hall and C. P. Huber, eds., Munksgaard. Copenhagen. pp 255-270.
 

Prince, E. 
Mathematical Techniques in Crystallography 
and Materials Science 
Springer-Verlag, New York, 1982. 
 
Watkin D.J. (1994). 
Acta Cryst, A50, 411-437. 
 
; 

# Uequiv = arithmetic mean of Ui i.e. Ueqiv = (U1+U2+U3)/3

# Replace last . with number of unfound hydrogen atomsattached to an atom.

# ..._refinement_flags_... 
# . no refinement constraints           S special position constraint on site
# G rigid group refinement of site      R riding atom
# D distance or angle restraint on site T thermal displacement constraints
# U Uiso or Uij restraint (rigid bond)  P partial occupancy constraint


loop_
_atom_site_label
_atom_site_type_symbol
_atom_site_fract_x
_atom_site_fract_y
_atom_site_fract_z
_atom_site_U_iso_or_equiv
_atom_site_occupancy
_atom_site_adp_type
_atom_site_refinement_flags_posn
_atom_site_refinement_flags_adp
_atom_site_refinement_flags_occupancy
_atom_site_disorder_assembly
_atom_site_disorder_group
_oxford_atom_site_special_shape
_atom_site_attached_hydrogens
I1 I 0.18932(4) 0.43486(2) 0.49631(4) 0.0441 1.0000 Uani . . . . . . . 
I2 I 0.21368(6) 0.27392(2) 0.73434(6) 0.0590 1.0000 Uani . . . . . . . 
I3 I 0.27817(4) 0.40587(2) 1.08576(4) 0.0386 1.0000 Uani . . . . . . . 
I4 I 0.82386(4) 0.39582(2) 0.80784(4) 0.0378 1.0000 Uani . . . . . . . 
I5 I 0.87641(4) 0.10560(2) 0.70180(4) 0.0379 1.0000 Uani . . . . . . . 
I6 I 0.55421(4) 0.11772(2) 0.92403(4) 0.0400 1.0000 Uani . . . . . . . 
As1 As 0.21498(6) 0.40829(3) 0.75405(6) 0.0341 1.0000 Uani . . . . . . . 
As2 As 0.51570(6) 0.41065(3) 0.96369(5) 0.0299 1.0000 Uani . . . . . . . 
As3 As 0.68532(6) 0.27704(3) 0.83248(5) 0.0326 1.0000 Uani . . . . . . . 
As4 As 0.83038(6) 0.12771(3) 0.95027(5) 0.0318 1.0000 Uani . . . . . . . 
C1 C 0.4245(6) 0.4228(3) 0.7795(6) 0.0352 1.0000 Uani . . . . . . . 
C2 C 0.5550(5) 0.3093(3) 0.9654(6) 0.0321 1.0000 Uani . . . . . . . 
C3 C 0.8394(6) 0.2316(3) 0.9498(6) 0.0346 1.0000 Uani . . . . . . . 
H11 H 0.4437 0.4693 0.7519 0.0421 1.0000 Uiso R . . . . . . 
H12 H 0.4679 0.3905 0.7233 0.0421 1.0000 Uiso R . . . . . . 
H21 H 0.5966 0.2972 1.0520 0.0384 1.0000 Uiso R . . . . . . 
H22 H 0.4665 0.2854 0.9483 0.0384 1.0000 Uiso R . . . . . . 
H31 H 0.8329 0.2476 1.0389 0.0415 1.0000 Uiso R . . . . . . 
H32 H 0.9290 0.2452 0.9203 0.0415 1.0000 Uiso R . . . . . . 

loop_
_atom_site_aniso_label
_atom_site_aniso_U_11
_atom_site_aniso_U_22
_atom_site_aniso_U_33
_atom_site_aniso_U_23
_atom_site_aniso_U_13
_atom_site_aniso_U_12
I1 0.03246(19) 0.0585(3) 0.0402(2) -0.00470(16) -0.00428(14) 0.00630(16) 
I2 0.0567(3) 0.0334(2) 0.0846(4) -0.0085(2) -0.0078(2) -0.00592(18) 
I3 0.0412(2) 0.0370(2) 0.0395(2) 0.00148(14) 0.01575(15) 0.00177(14) 
I4 0.0362(2) 0.0421(2) 0.03630(19) 0.00253(14) 0.01017(14) -0.00110(14) 
I5 0.0402(2) 0.0462(2) 0.02767(17) -0.00014(14) 0.00568(14) 0.00562(15) 
I6 0.03055(19) 0.0426(2) 0.0477(2) -0.00191(15) 0.00762(15) -0.00053(14) 
As1 0.0268(3) 0.0336(3) 0.0420(3) -0.0049(2) 0.0037(2) -0.0003(2) 
As2 0.0304(3) 0.0300(2) 0.0294(3) -0.00108(19) 0.00312(19) -0.00099(19) 
As3 0.0322(3) 0.0366(3) 0.0289(3) -0.0039(2) 0.0012(2) 0.0037(2) 
As4 0.0303(3) 0.0372(3) 0.0280(3) 0.0005(2) 0.0037(2) 0.0050(2) 
C1 0.031(3) 0.041(3) 0.033(3) 0.004(2) 0.002(2) -0.007(2) 
C2 0.025(2) 0.031(2) 0.041(3) -0.001(2) 0.008(2) 0.0027(18) 
C3 0.027(2) 0.038(3) 0.038(3) -0.004(2) -0.001(2) 0.002(2) 

_refine_ls_extinction_method 
    'None'
_oxford_refine_ls_scale 0.24599(19) 
loop_
 _geom_bond_atom_site_label_1
 _geom_bond_site_symmetry_1
 _geom_bond_atom_site_label_2
 _geom_bond_site_symmetry_2
 _geom_bond_distance
 _geom_bond_publ_flag
I1 . As1 . 2.6228(8)    yes
I2 . As1 . 2.5721(7)    yes
I3 . As2 . 2.6312(7)    yes
I4 . As3 . 2.6346(7)    yes
I5 . As4 . 2.5966(6)    yes
I6 . As4 . 2.5880(7)    yes
As1 . C1 . 1.980(6)    yes
As2 . C1 . 1.982(5)    yes
As2 . C2 . 1.969(5)    yes
As3 . C2 . 1.979(5)    yes
As3 . C3 . 1.984(5)    yes
As4 . C3 . 1.984(6)    yes
C1 . H11 . 0.950    no
C1 . H12 . 0.950    no
C2 . H21 . 0.950    no
C2 . H22 . 0.950    no
C3 . H31 . 0.950    no
C3 . H32 . 0.950    no
loop_
 _geom_angle_atom_site_label_1
 _geom_angle_site_symmetry_1
 _geom_angle_atom_site_label_2
 _geom_angle_site_symmetry_2
 _geom_angle_atom_site_label_3
 _geom_angle_site_symmetry_3
 _geom_angle
 _geom_angle_publ_flag
I2 . As1 . I1 . 96.76(3)    yes
I2 . As1 . C1 . 98.49(18)    yes
I1 . As1 . C1 . 96.17(16)    yes
I3 . As2 . C1 . 96.96(16)    yes
I3 . As2 . C2 . 97.31(15)    yes
C1 . As2 . C2 . 100.9(2)    yes
I4 . As3 . C2 . 97.63(16)    yes
I4 . As3 . C3 . 95.24(17)    yes
C2 . As3 . C3 . 101.4(2)    yes
I6 . As4 . I5 . 97.83(2)    yes
I6 . As4 . C3 . 96.66(16)    yes
I5 . As4 . C3 . 98.61(17)    yes
As1 . C1 . As2 . 116.7(3)    yes
As1 . C1 . H11 . 107.6    no
As2 . C1 . H11 . 107.6    no
As1 . C1 . H12 . 107.6    no
As2 . C1 . H12 . 107.6    no
H11 . C1 . H12 . 109.5    no
As2 . C2 . As3 . 115.2(3)    yes
As2 . C2 . H21 . 108.0    no
As3 . C2 . H21 . 108.0    no
As2 . C2 . H22 . 108.0    no
As3 . C2 . H22 . 108.0    no
H21 . C2 . H22 . 109.5    no
As4 . C3 . As3 . 114.1(3)    yes
As4 . C3 . H31 . 108.3    no
As3 . C3 . H31 . 108.3    no
As4 . C3 . H32 . 108.3    no
As3 . C3 . H32 . 108.3    no
H31 . C3 . H32 . 109.5    no

#------------------------------------------------------------------------------
loop_
_geom_contact_atom_site_label_1
_geom_contact_atom_site_label_2
_geom_contact_distance
_geom_contact_site_symmetry_1
_geom_contact_site_symmetry_2
_geom_contact_publ_flag
 I1        As4       3.5647(7)  . 4_454 no
 As2       As2       3.505(1)   . 2_667 no
#------------------------------------------------------------------------------
loop_
_geom_torsion_atom_site_label_1
_geom_torsion_atom_site_label_2
_geom_torsion_atom_site_label_3
_geom_torsion_atom_site_label_4
_geom_torsion_site_symmetry_1
_geom_torsion_site_symmetry_2
_geom_torsion_site_symmetry_3
_geom_torsion_site_symmetry_4
_geom_torsion
_geom_torsion_publ_flag
 I1 As1 C1 As2 . . . . 179.5(3) no
 I2 As1 C1 As2 . . . . -82.7(3) no
 I3 As2 C1 As1 . . . . -11.3(3) no
 I3 As2 C2 As3 . . . . 159.8(2) no
 I4 As3 C2 As2 . . . . 25.6(3) no
 I4 As3 C3 As4 . . . . -158.2(3) no
 I5 As4 C3 As3 . . . . 64.6(3) no
 I6 As4 C3 As3 . . . . -34.4(3) no
 As1 C1 As2 C2 . . . . 87.5(3) no
 As2 C2 As3 C3 . . . . 122.5(3) no
 As3 C2 As2 C1 . . . . 61.2(3) no
 As4 C3 As3 C2 . . . . 102.9(3) no
#------------------------------------------------------------------------------

#===END
